# Supplementary material for: Prikaz knjiga: 'Mape uma' i 'Savršeno pamćenje' Tonija Buzana - Brzo čitanje: iluzija, talenat ili veština koja se uči - Finesa, Beograd, 1999.
Source: Royal Society of Chemistry journal article supplement (doi:10.1039/d1fo01117k), 1999-01-01
Supplement: d1fo01117k1.pdf [file d1fo01117k1.pdf]

**Gut dysbiosis correction contributes to the hepatoprotective effects of *Thymus quinquecostatus* CELAK extract against alcohol through gut-liver axis**

Xin Yan<sup>a</sup>, Yu Wang<sup>a</sup>, Xue-Yang Ren<sup>a</sup>, Xiao-Yun Liu<sup>a</sup>, Jia-Mu Ma<sup>a</sup>, Ruo-Lan Song<sup>a</sup>,  
Xiu-Huan Wang<sup>a</sup>, Ying Dong<sup>a</sup>, A-Xiang Yu<sup>a</sup>, Qi-Qi Fan<sup>a</sup>, Jing Wei<sup>a</sup>, Gai-Mei She<sup>a</sup>. \*

<sup>a</sup> *School of Chinese Materia Medica, Beijing University of Chinese Medicine, Beijing, 102488, China*

\* Corresponding author (Gai-Mei She). Tel.: +010-53912129, *E-mail addresses:*

[shegaimei@126.com](mailto:shegaimei@126.com)

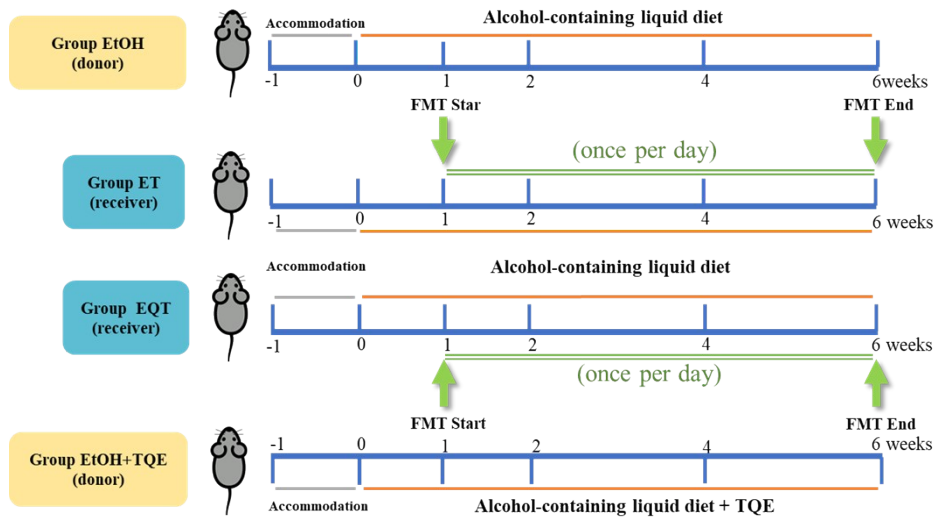

Supplementary Fig. S1. Study design of FMT experiment.

**Supplementary Tab. S1.** Identified compounds in the TQE by UPLC-MS/MS.

| No. | t <sub>R</sub><br>(min) | Ion mode | Formula                                         | Measured mass<br>( <i>m/z</i> ) | MS/MS data ( <i>m/z</i> )    | Proposed compound                      |
|-----|-------------------------|----------|-------------------------------------------------|---------------------------------|------------------------------|----------------------------------------|
| 1   | 16.22                   | Negative | C <sub>9</sub> H <sub>10</sub> O <sub>5</sub>   | 197.0456                        | 151                          | Salvianic acid A                       |
| 2   | 16.39                   | Positive | C <sub>8</sub> H <sub>8</sub> O <sub>4</sub>    | 169.0492                        | 151, 133, 123                | Orsellinic acid                        |
| 3   | 17.36                   | Negative | C <sub>13</sub> H <sub>18</sub> O <sub>7</sub>  | 285.0982                        | 135, 123                     | Orcinol glucoside                      |
| 4   | 18.05                   | Negative | C <sub>14</sub> H <sub>20</sub> O <sub>7</sub>  | 299.1138                        | 261, 161, 119                | Salidroside                            |
| 5   | 18.26                   | Positive | C <sub>7</sub> H <sub>6</sub> O <sub>3</sub>    | 139.0388                        | 111, 93, 65                  | 3,4-Dihydroxybenzaldehyde              |
| 6   | 18.31                   | Positive | C <sub>15</sub> H <sub>16</sub> O <sub>9</sub>  | 341.0862                        | 179, 161, 151, 133, 123      | Esculin                                |
| 7   | 18.65                   | Positive | C <sub>15</sub> H <sub>16</sub> O <sub>8</sub>  | 325.0913                        | 163, 135, 117                | Skimmin                                |
| 8   | 18.69                   | Positive | C <sub>15</sub> H <sub>12</sub> O <sub>7</sub>  | 305.0649                        | 259, 231, 153                | Taxifolin                              |
| 9   | 18.96                   | Positive | C <sub>16</sub> H <sub>18</sub> O <sub>9</sub>  | 355.1015                        | 163, 145, 135, 117           | Chlorogenic acid                       |
| 10  | 18.98                   | Negative | C <sub>15</sub> H <sub>18</sub> O <sub>8</sub>  | 325.0931                        | 163, 119                     | Bilobalide                             |
| 11  | 19.15                   | Positive | C <sub>21</sub> H <sub>20</sub> O <sub>11</sub> | 449.1072                        | 287, 241, 153                | Cynaroside                             |
| 12  | 19.62                   | Positive | C <sub>15</sub> H <sub>10</sub> O <sub>7</sub>  | 303.0491                        | 257, 119, 201                | Robinetin                              |
| 13  | 20.06                   | Positive | C <sub>9</sub> H <sub>10</sub> O <sub>5</sub>   | 199.0597                        | 181, 155, 140, 95            | Syringic acid                          |
| 14  | 20.22                   | Positive | C <sub>18</sub> H <sub>16</sub> O <sub>8</sub>  | 361.0911                        | 163, 135                     | Rosmarinic acid                        |
| 15  | 20.41                   | Positive | C <sub>15</sub> H <sub>12</sub> O <sub>6</sub>  | 289.0700                        | 271, 179, 163, 153, 135, 117 | Eriodictyol                            |
| 16  | 20.53                   | Negative | C <sub>21</sub> H <sub>20</sub> O <sub>11</sub> | 447.0936                        | 327, 297, 135                | Orientin                               |
| 17  | 20.60                   | Positive | C <sub>27</sub> H <sub>30</sub> O <sub>16</sub> | 611.1597                        | 465, 303                     | Rutin                                  |
| 18  | 20.76                   | Positive | C <sub>21</sub> H <sub>18</sub> O <sub>13</sub> | 479.0813                        | 303, 135                     | Quercetin 3- <i>O</i> -β-D-Glucuronide |
| 19  | 20.81                   | Positive | C <sub>21</sub> H <sub>20</sub> O <sub>12</sub> | 465.1018                        | 303, 229, 145, 465           | Hyperoside                             |
| 20  | 20.96                   | Positive | C <sub>21</sub> H <sub>20</sub> O <sub>11</sub> | 449.1068                        | 287, 153, 135                | Kuromanin                              |
| 21  | 21.21                   | Negative | C <sub>27</sub> H <sub>32</sub> O <sub>15</sub> | 595.1677                        | 287, 151, 135                | Eriocitrin                             |
| 22  | 21.48                   | Negative | C <sub>21</sub> H <sub>20</sub> O <sub>10</sub> | 431.0988                        | 413, 311, 282, 151           | Vitexin                                |
| 23  | 21.52                   | Negative | C <sub>28</sub> H <sub>34</sub> O <sub>14</sub> | 593.1858                        | 327, 285                     | Poncirin                               |

| No. | t <sub>R</sub><br>(min) | Ion mode | Formula                                         | Measured mass<br>( <i>m/z</i> ) | MS/MS data ( <i>m/z</i> )         | Proposed compound                   |
|-----|-------------------------|----------|-------------------------------------------------|---------------------------------|-----------------------------------|-------------------------------------|
| 24  | 21.54                   | Positive | C <sub>14</sub> H <sub>12</sub> O <sub>3</sub>  | 229.0856                        | 201, 158, 157, 141, 129, 105      | Trioxsalen                          |
| 25  | 21.71                   | Positive | C <sub>21</sub> H <sub>18</sub> O <sub>12</sub> | 463.0859                        | 287, 269, 169, 119                | Scutellarin                         |
| 26  | 21.93                   | Positive | C <sub>21</sub> H <sub>20</sub> O <sub>10</sub> | 433.1122                        | 271, 153                          | Genistin                            |
| 27  | 22.17                   | Negative | C <sub>27</sub> H <sub>32</sub> O <sub>14</sub> | 579.1730                        | 271, 151, 119                     | Narirutin                           |
| 28  | 22.23                   | Positive | C <sub>27</sub> H <sub>30</sub> O <sub>14</sub> | 579.1698                        | 433, 271, 153                     | Rhoifolin                           |
| 29  | 22.53                   | Negative | C <sub>16</sub> H <sub>18</sub> O <sub>9</sub>  | 353.0878                        | 191, 179, 173, 135, 93, 85        | Neochlorogenic acid                 |
| 30  | 22.54                   | Positive | C <sub>21</sub> H <sub>20</sub> O <sub>11</sub> | 449.1069                        | 287, 213                          | Astragalin                          |
| 31  | 22.60                   | Positive | C <sub>28</sub> H <sub>32</sub> O <sub>15</sub> | 609.1805                        | 463, 301, 271, 153, 119           | Neodiosmin                          |
| 32  | 22.63                   | Positive | C <sub>10</sub> H <sub>8</sub> O <sub>5</sub>   | 209.0442                        | 194, 181, 163, 149, 135, 107      | Fraxetin                            |
| 33  | 22.77                   | Positive | C <sub>21</sub> H <sub>20</sub> O <sub>10</sub> | 433.1122                        | 271, 153, 119                     | Apigenin-7- <i>O</i> -β-D-glucoside |
| 34  | 22.88                   | Negative | C <sub>15</sub> H <sub>10</sub> O <sub>5</sub>  | 269.0458                        | 227, 225, 201, 151, 117           | Apigenin                            |
| 35  | 22.89                   | Positive | C <sub>21</sub> H <sub>18</sub> O <sub>11</sub> | 447.0913                        | 271, 153, 119                     | Apigenin 7- <i>O</i> -glucuronide   |
| 36  | 22.90                   | Negative | C <sub>25</sub> H <sub>24</sub> O <sub>12</sub> | 515.1196                        | 353, 299, 179, 173, 135           | Isochlorogenic acid C               |
| 37  | 23.00                   | Positive | C <sub>36</sub> H <sub>30</sub> O <sub>16</sub> | 719.1596                        | 719, 539, 521, 341, 323, 281      | Salvianolic acid B                  |
| 38  | 23.19                   | Positive | C <sub>9</sub> H <sub>8</sub> O <sub>4</sub>    | 181.0491                        | 163, 145, 139, 135                | Caffeic acid                        |
| 39  | 23.26                   | Positive | C <sub>27</sub> H <sub>22</sub> O <sub>12</sub> | 539.1174                        | 163, 135                          | Lithospermic acid                   |
| 40  | 23.27                   | Positive | C <sub>15</sub> H <sub>10</sub> O <sub>4</sub>  | 255.0645                        | 181, 153                          | Chrysin                             |
| 41  | 23.72                   | Positive | C <sub>29</sub> H <sub>34</sub> O <sub>15</sub> | 623.1955                        | 477, 315                          | Pectolarin                          |
| 42  | 24.24                   | Positive | C <sub>15</sub> H <sub>10</sub> O <sub>6</sub>  | 287.0543                        | 269, 169, 123                     | Scutellarein                        |
| 43  | 24.30                   | Positive | C <sub>11</sub> H <sub>12</sub> O <sub>5</sub>  | 225.0752                        | 207, 175, 147, 119, 91            | Sinapinic acid                      |
| 44  | 24.46                   | Positive | C <sub>16</sub> H <sub>14</sub> O <sub>6</sub>  | 303.0856                        | 258, 177, 153,                    | Hesperetin                          |
| 45  | 24.48                   | Positive | C <sub>10</sub> H <sub>10</sub> O <sub>4</sub>  | 195.0648                        | 145, 117, 89                      | Ferulic acid                        |
| 46  | 24.63                   | Positive | C <sub>28</sub> H <sub>32</sub> O <sub>14</sub> | 593.1855                        | 447, 285, 270                     | Linarin                             |
| 47  | 24.67                   | Positive | C <sub>26</sub> H <sub>22</sub> O <sub>10</sub> | 495.1278                        | 315, 297, 205, 199, 181, 163, 135 | Salvianolic acid A                  |

| No. | t <sub>R</sub><br>(min) | Ion mode | Formula                                         | Measured mass<br>( <i>m/z</i> ) | MS/MS data ( <i>m/z</i> )              | Proposed compound              |
|-----|-------------------------|----------|-------------------------------------------------|---------------------------------|----------------------------------------|--------------------------------|
| 48  | 24.81                   | Negative | C <sub>10</sub> H <sub>12</sub> O <sub>2</sub>  | 163.0765                        | 148, 121, 93                           | Eugenol                        |
| 49  | 25.02                   | Positive | C <sub>16</sub> H <sub>12</sub> O <sub>5</sub>  | 285.0751                        | 270, 242, 153                          | Acacetin                       |
| 50  | 25.53                   | Positive | C <sub>15</sub> H <sub>10</sub> O <sub>6</sub>  | 287.0544                        | 269, 241, 213, 153, 135                | Luteolin                       |
| 51  | 25.62                   | Positive | C <sub>15</sub> H <sub>10</sub> O <sub>7</sub>  | 303.0494                        | 229, 183, 153, 137,                    | Quercetin                      |
| 52  | 25.82                   | Negative | C <sub>22</sub> H <sub>20</sub> O <sub>11</sub> | 459.0940                        | 285, 269, 175, 113                     | Wogonoside                     |
| 53  | 26.33                   | Positive | C <sub>16</sub> H <sub>12</sub> O <sub>7</sub>  | 317.0651                        | 302, 168, 137                          | Nepetin                        |
| 54  | 26.49                   | Positive | C <sub>17</sub> H <sub>14</sub> O <sub>7</sub>  | 331.0805                        | 316, 301, 151, 183                     | Jaceosidin                     |
| 55  | 26.87                   | Positive | C <sub>15</sub> H <sub>10</sub> O <sub>4</sub>  | 255.0646                        | 227, 181, 153                          | Daidzein                       |
| 56  | 26.93                   | Negative | C <sub>20</sub> H <sub>22</sub> O <sub>9</sub>  | 405.1192                        | 243, 225, 159                          | Astringin                      |
| 57  | 27.37                   | Positive | C <sub>15</sub> H <sub>12</sub> O <sub>5</sub>  | 273.0751                        | 255, 153, 119                          | Naringenin                     |
| 58  | 27.86                   | Positive | C <sub>15</sub> H <sub>10</sub> O <sub>6</sub>  | 287.0544                        | 269, 153, 133, 121                     | Kaempferol                     |
| 59  | 29.27                   | Positive | C <sub>18</sub> H <sub>16</sub> O <sub>7</sub>  | 345.0961                        | 330, 329, 301                          | Eupatilin                      |
| 60  | 30.61                   | Positive | C <sub>17</sub> H <sub>14</sub> O <sub>6</sub>  | 315.0854                        | 282, 254, 226, 136                     | Scrophulein                    |
| 61  | 31.03                   | Negative | C <sub>19</sub> H <sub>18</sub> O <sub>8</sub>  | 373.0931                        | 343, 328                               | Chrysosplenetin B              |
| 62  | 31.25                   | Positive | C <sub>17</sub> H <sub>14</sub> O <sub>6</sub>  | 315.0853                        | 300, 257                               | Pectolinarigenin               |
| 63  | 32.16                   | Positive | C <sub>18</sub> H <sub>16</sub> O <sub>7</sub>  | 345.0960                        | 330, 315, 227, 119                     | Xanthomicrol                   |
| 64  | 32.48                   | Positive | C <sub>16</sub> H <sub>14</sub> O <sub>5</sub>  | 287.0906                        | 167, 147, 119                          | Sakuranetin                    |
| 65  | 32.83                   | Positive | C <sub>16</sub> H <sub>12</sub> O <sub>5</sub>  | 285.0750                        | 270, 242                               | Genkwanin                      |
| 66  | 32.89                   | Positive | C <sub>18</sub> H <sub>16</sub> O <sub>7</sub>  | 345.0960                        | 330, 315, 183, 213, 133                | Lysionotin                     |
| 67  | 33.83                   | Positive | C <sub>30</sub> H <sub>46</sub> O <sub>5</sub>  | 487.3408                        | 405, 119                               | Quillaic acid                  |
| 68  | 36.17                   | Positive | C <sub>20</sub> H <sub>20</sub> O <sub>8</sub>  | 389.1221                        | 359, 341, 331, 313, 227, 197, 169, 163 | 5- <i>O</i> -Demethylnobiletin |
| 69  | 38.18                   | Positive | C <sub>19</sub> H <sub>18</sub> O <sub>7</sub>  | 359.1115                        | 329, 311, 197, 169                     | Gardenin B                     |
| 70  | 38.48                   | Positive | C <sub>15</sub> H <sub>18</sub> O <sub>2</sub>  | 231.1373                        | 129, 119                               | Dehydrocostus lactone          |
| 71  | 41.49                   | Positive | C <sub>30</sub> H <sub>46</sub> O <sub>4</sub>  | 471.3461                        | 407, 235                               | 18 β-Glycyrrhetic Acid         |

| No. | $t_R$<br>(min) | Ion mode | Formula                                        | Measured mass<br>( $m/z$ ) | MS/MS data ( $m/z$ )                        | Proposed compound   |
|-----|----------------|----------|------------------------------------------------|----------------------------|---------------------------------------------|---------------------|
| 72  | 43.28          | Positive | C <sub>17</sub> H <sub>24</sub> O <sub>3</sub> | 277.1792                   | 137                                         | Shogaol             |
| 73  | 43.93          | Positive | C <sub>15</sub> H <sub>24</sub> O              | 221.1895                   | 203, 165, 149, 147, 121, 107                | Caryophyllene oxide |
| 74  | 45.43          | Positive | C <sub>30</sub> H <sub>48</sub> O <sub>4</sub> | 473.3617                   | 409, 249, 203                               | Maslinic acid       |
| 75  | 47.14          | Positive | C <sub>30</sub> H <sub>48</sub> O <sub>3</sub> | 457.3665                   | 439, 411, 393, 249, 191                     | Ursolic acid        |
| 76  | 49.97          | Positive | C <sub>30</sub> H <sub>50</sub> O <sub>2</sub> | 443.3877                   | 425, 407, 235, 217, 203, 189, 175, 161, 121 | Betulin             |
